# Supplementary material
Source: MDPI journal article supplement (https://www.mdpi.com/1999-4907/13/5/738)
Supplement: s1 [file s1]

**Table S1.** Characteristics of the study species (Klinka et al., 2000). Subscripts ‘c’ and ‘i’ indicate respectively coastal and interior ranges

| Species                         | Tolerance |        |        |        |         |               |        | Range (Western North America) |
|---------------------------------|-----------|--------|--------|--------|---------|---------------|--------|-------------------------------|
|                                 | Shade     | Fire   | Frost  | Heat   | Drought | Water surplus | Snow   |                               |
| Alaska-cedar                    | High      | Low    | Low    | Low    | Medium  | High          | Medium | Coastal                       |
| Amabilis fir                    | High      | Low    | Medium | Low    | Low     | High          | High   | Coastal                       |
| Black cottonwood                | Low       | Low    | Medium | Medium | Low     | High          | Medium | Coastal to interior           |
| Douglas-fir <sub>c</sub>        | Low       | Medium | Low    | Medium | Medium  | Low           | Low    | Coastal                       |
| Douglas-fir <sub>i</sub>        | High      | High   | Medium | High   | Medium  | Low           | Medium | Interior                      |
| Engelmann spruce                | Medium    | Low    | High   | Medium | Medium  | High          | High   | Interior                      |
| Grand fir <sub>c</sub>          | Low       | Low    | Low    | Medium | Medium  | High          | Medium | Coastal                       |
| Grand fir <sub>i</sub>          | Medium    | Low    | Medium | Medium | Medium  | High          | Medium | Interior                      |
| Lodgepole pine                  | Low       | High   | Medium | Medium | High    | High          | Low    | Coastal and interior          |
| Mountain hemlock <sub>c,i</sub> | High      | Low    | Medium | Low    | Low     | Medium        | Medium | Coastal and interior          |
| Ponderosa pine                  | Low       | High   | Medium | High   | High    | High          | Medium | Coastal to interior           |
| Red alder                       | Low       | Low    | Low    | Low    | Low     | High          | Low    | Coastal                       |
| Sitka spruce                    | Medium    | Low    | Low    | Low    | Low     | High          | Low    | Coastal                       |
| Subalpine fir                   | High      | Low    | High   | Medium | Medium  | High          | High   | Interior                      |
| Western hemlock <sub>c</sub>    | High      | Low    | Low    | Low    | Low     | Medium        | Low    | Coastal                       |

|                                 |        |        |        |        |        |        |        |          |
|---------------------------------|--------|--------|--------|--------|--------|--------|--------|----------|
| Western hemlock <sub>i</sub>    | High   | Low    | Low    | Low    | Low    | Medium | Medium | Interior |
| Western larch                   | Low    | High   | Medium | Medium | Medium | Low    | High   | Interior |
| Western redcedar <sub>c</sub>   | High   | Low    | Low    | Medium | Medium | High   | Low    | Coastal  |
| Western redcedar <sub>i</sub>   | High   | Medium | Medium | Medium | Medium | High   | Medium | Interior |
| Western white pine <sub>c</sub> | Medium | Medium | Medium | Medium | Low    | High   | High   | Coastal  |
| Western white pine <sub>i</sub> | Medium | High   | High   | Medium | Low    | High   | High   | Interior |

**Table S2.** Correlation coefficient between the continuous explanatory variables. AN\_T = mean annual temperature, JJA\_T = mean summer temperature between June to August, annual (PDSI\_AN) and June-August PDSI (Palmer Drought Severity Index; PDSI\_JJA). ED = establishment date.

| Variables      | AN_T (°C) | JJA_T (°C) | PDSI_AN | PDSI_JJA | ED     | Latitude (°N) | Longitude (°W) | Elevation |
|----------------|-----------|------------|---------|----------|--------|---------------|----------------|-----------|
| AN_T (°C)      |           |            |         |          |        |               |                |           |
| JJA_T (°C)     | 0.848     |            |         |          |        |               |                |           |
| PDSI_AN        | 0.065     | 0.017      |         |          |        |               |                |           |
| PDSI_JJA       | 0.108     | 0.077      | 0.947   |          |        |               |                |           |
| ED             | 0.157     | 0.278      | -0.026  | 0.084    |        |               |                |           |
| Latitude (°N)  | -0.327    | -0.432     | 0.029   | -0.023   | -0.306 |               |                |           |
| Longitude (°W) | 0.156     | -0.171     | 0.048   | 0.028    | -0.329 | 0.721         |                |           |
| Elevation (m)  | -0.460    | -0.244     | -0.079  | -0.054   | 0.174  | -0.661        | -0.786         |           |

**Table S3.** Average of the whole plots SI with standard deviation for each species.

| Species                         | SI $\pm$ SD      |
|---------------------------------|------------------|
| Alaska-cedar                    | 8.48 $\pm$ 3.02  |
| Amabilis fir                    | 16.84 $\pm$ 7.39 |
| Black cottonwood                | 21.66 $\pm$ 7.02 |
| Douglas-fir <sub>c</sub>        | 27.66 $\pm$ 7.92 |
| Douglas-fir <sub>i</sub>        | 17.21 $\pm$ 7.25 |
| Engelmann spruce                | 12.51 $\pm$ 4.54 |
| Grand fir <sub>c</sub>          | 29.13 $\pm$ 7.65 |
| Grand fir <sub>i</sub>          | 21.26 $\pm$ 9.44 |
| Lodgepole pine                  | 14.98 $\pm$ 4.96 |
| Mountain hemlock <sub>c</sub>   | 5.97 $\pm$ 2.93  |
| Mountain hemlock <sub>i</sub>   | 10.69 $\pm$ 3.24 |
| Ponderosa pine                  | 16.98 $\pm$ 8.42 |
| Red alder                       | 27.18 $\pm$ 4.99 |
| Sitka spruce                    | 24.28 $\pm$ 8.63 |
| Subalpine fir                   | 12.15 $\pm$ 4.90 |
| Western hemlock <sub>c</sub>    | 21.74 $\pm$ 7.58 |
| Western hemlock <sub>i</sub>    | 16.05 $\pm$ 4.57 |
| Western larch                   | 19.27 $\pm$ 4.00 |
| Western redcedar <sub>c</sub>   | 17.95 $\pm$ 5.90 |
| Western redcedar <sub>i</sub>   | 14.71 $\pm$ 5.17 |
| Western white pine <sub>c</sub> | 19.27 $\pm$ 6.01 |

Western white pine;  $20.71 \pm 6.26$

---

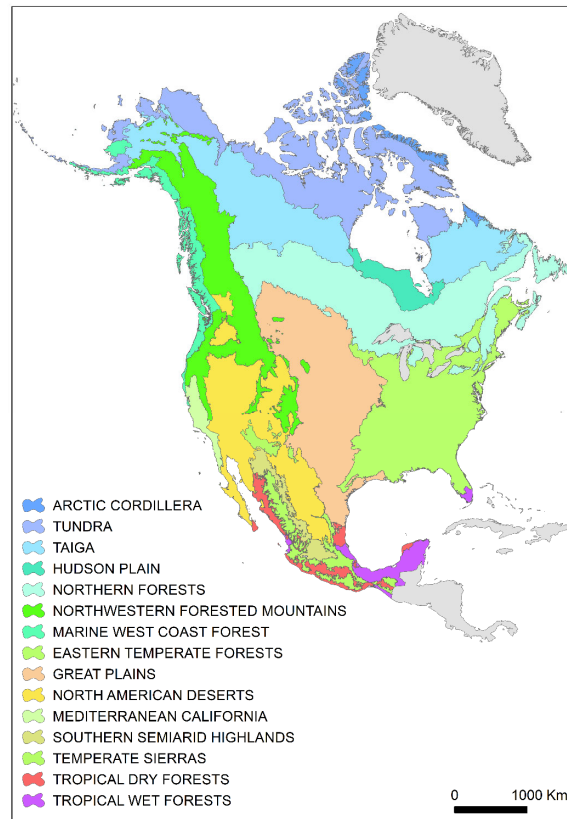

Figure S1. Major ecoregions of North America ([http://ecologicalregions.info/htm/na\\_eco.htm](http://ecologicalregions.info/htm/na_eco.htm)).
